# Supplementary material for: Multi-phase, multi-ethnic GWAS uncovers putative loci in predisposition to human sprint performance, health and disease
Source: bioRxiv or medRxiv preprint supplement (doi:10.1101/2023.12.08.23299720), 2023-12-09
Supplement: Supplementary file [file media-1.pdf]

Supplementary Figures and Tables for:

**Multi-phase, multi-ethnic GWAS uncovers putative loci in predisposition to human sprint performance, health and disease**

Guan Wang<sup>1\*</sup>, Noriyuki Fuku<sup>2</sup>, Eri Miyamoto-Mikami<sup>2</sup>, Masashi Tanaka<sup>3</sup>, Motohiko Miyachi<sup>4</sup>, Haruka Murakami<sup>5</sup>, Yu-Ching Cheng<sup>6</sup>, Braxton D. Mitchell<sup>6</sup>, Errol Morrison<sup>7</sup>, Krista G. Austin<sup>1</sup>, Ildus I. Ahmetov<sup>8-10</sup>, Sportgene Research Group, Edward V. Genozov<sup>11</sup>, Maxim L. Filipenko<sup>12,13</sup>, Andrei A. Gilep<sup>14,15</sup>, Valentina Gineviciene<sup>16</sup>, Colin N. Moran<sup>17</sup>, Tomas Venckunas<sup>18</sup>, Pawel Cieszczyk<sup>19</sup>, Wim Derave<sup>20</sup>, Ioannis Papadimitriou<sup>21</sup>, Fleur C. Garton<sup>22</sup>, Kathryn North<sup>23,24</sup>, Sandosh Padmanabhan<sup>25</sup>, Yannis P. Pitsiladis<sup>1\*</sup>.

\*Corresponding authors. Email: gw344@yale.edu; ypitsiladis@hkbu.edu.hk

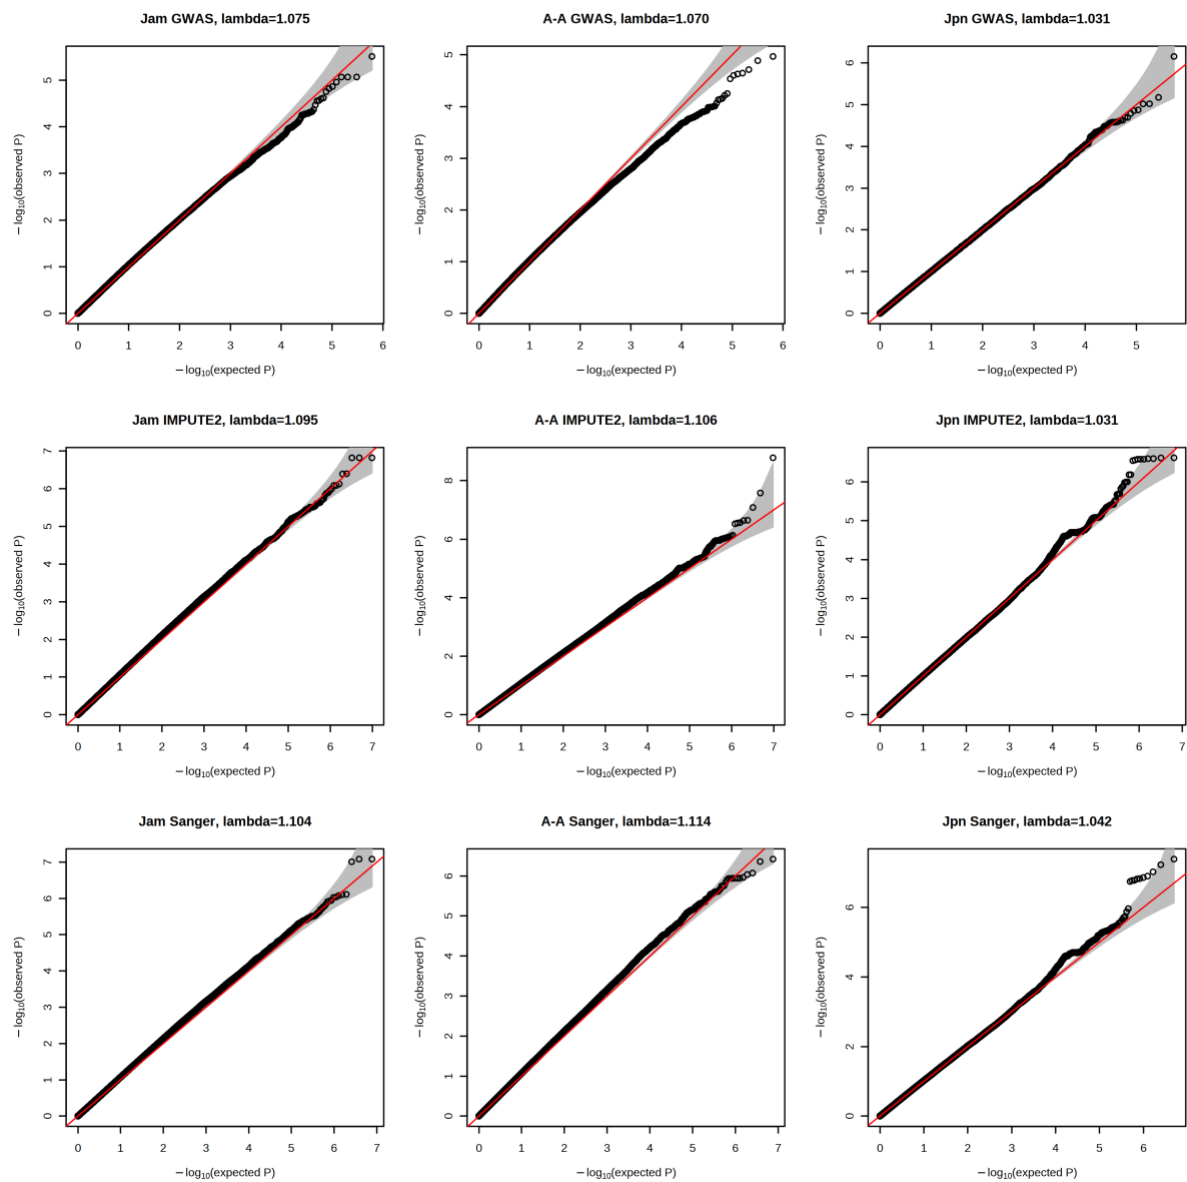

Supplementary Fig. S1. Q-Q plots of the GWAS, IMPUTE2 and Sanger Imputation Server results in Jam, A-A, and Jpn cohorts.

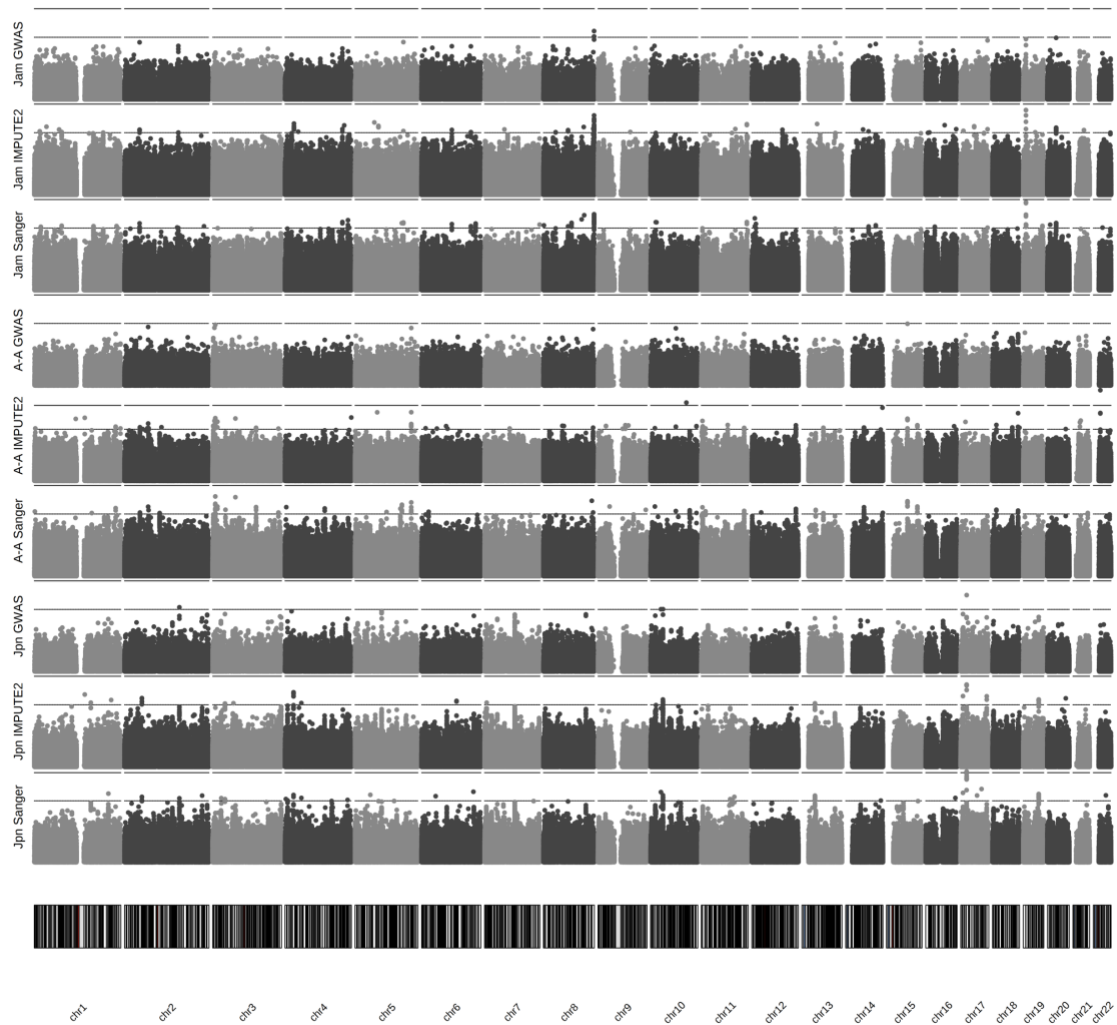

Supplementary Fig. S2. Manhattan plots of the GWAS, IMPUTE2 and Sanger Imputation Server results in Jam, A-A, and Jpn cohorts across 22 autosomes. Dotted line: suggestive significance cut-off of  $1E-05$ ; dashed line: genome-wide significance cut-off of  $5E-08$ .

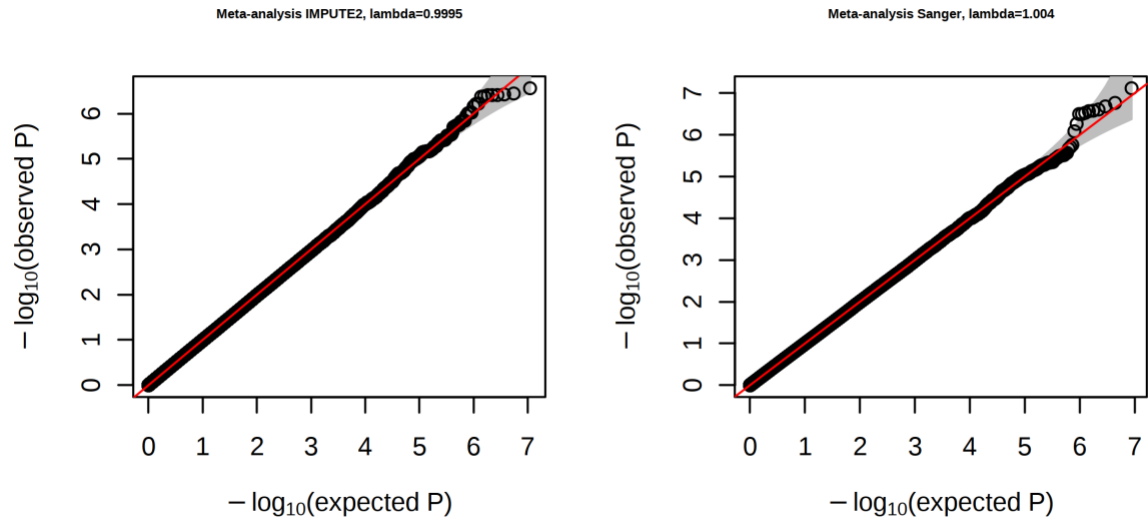

Supplementary Fig. S3. QQ-plots of the meta-analysis of the imputed results across Jam, A-A and Jpn, following imputation using IMPUTE2 and Sanger Imputation server.

GALNT13 — Central Nervous System

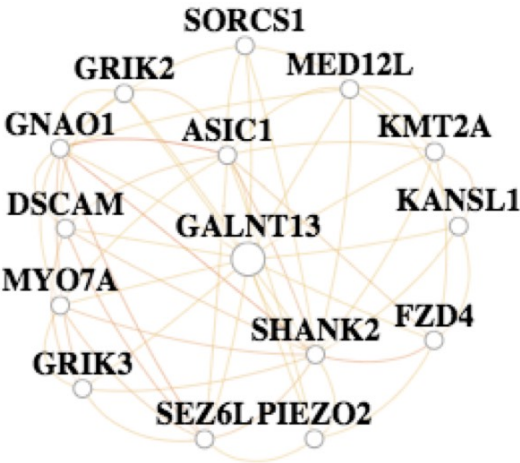

GALNT13 — Forebrain Development

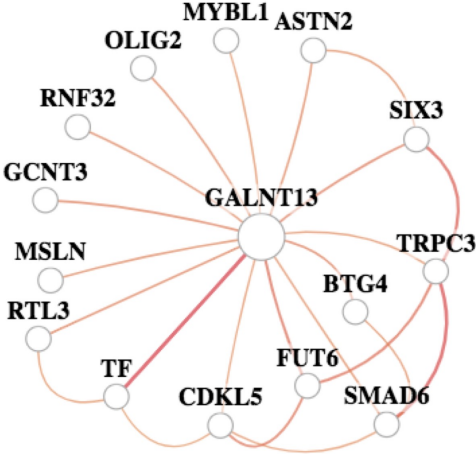

STXBP2 — Leukocyte

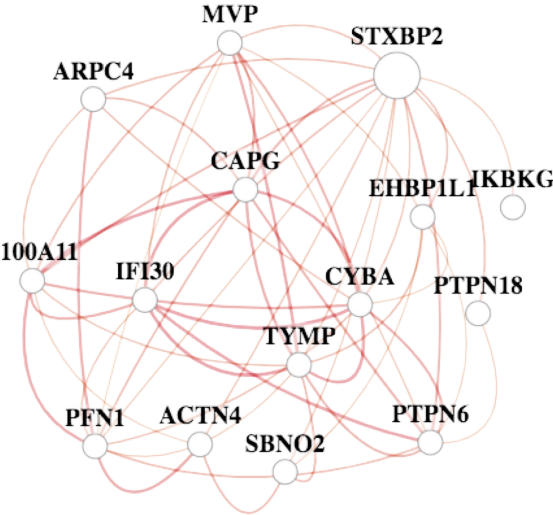

STXBP2 — Leukocyte Migration

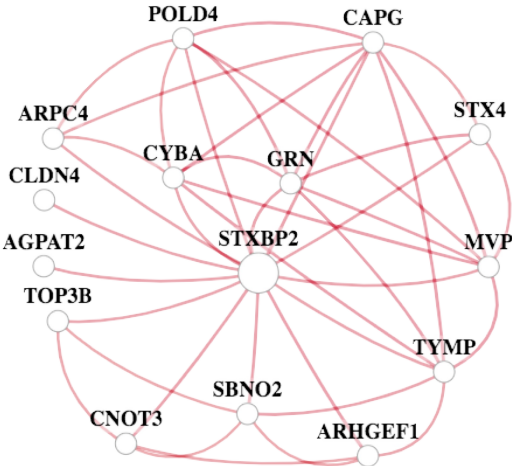

BOP1 & HSF1 — Peripheral Nervous System

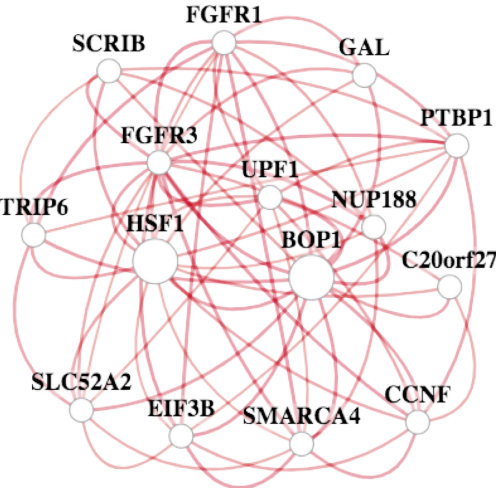

BOP1 & HSF1 — Ubiquitin-dependent Protein Catabolic Process

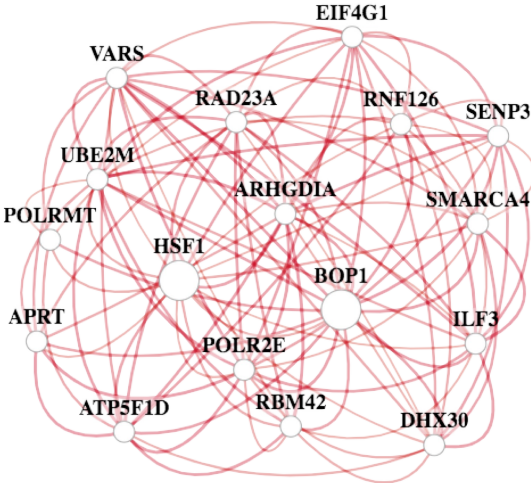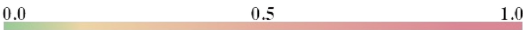

GRM7 — Forebrain

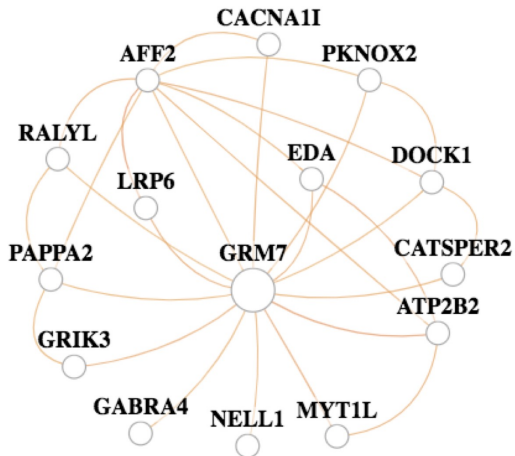

GRM7 — Glutamate Receptor Signalling Pathway

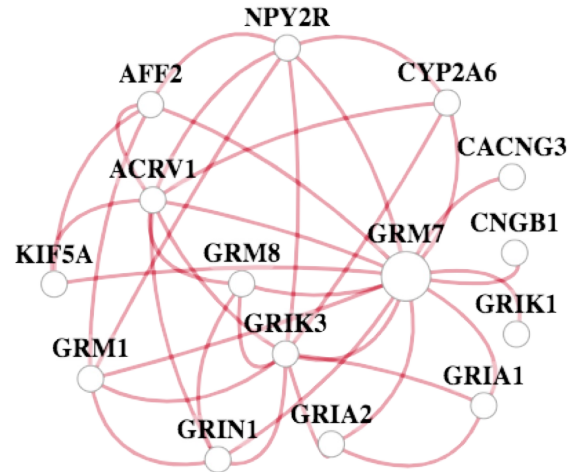

GALNT13, GRM7, MPRIP —  
Glutamate Receptor Signalling Pathway

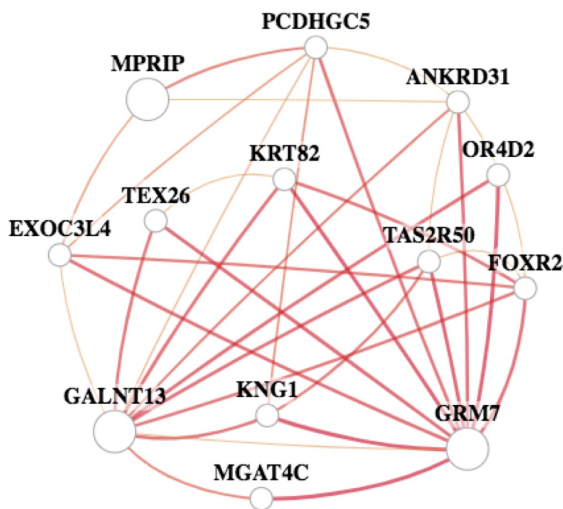

ZFYVE28 — Caudate Nucleus

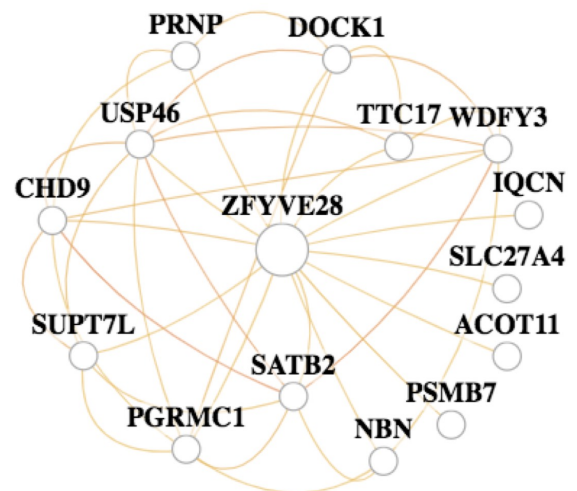

ADAMTS18 — Nervous System

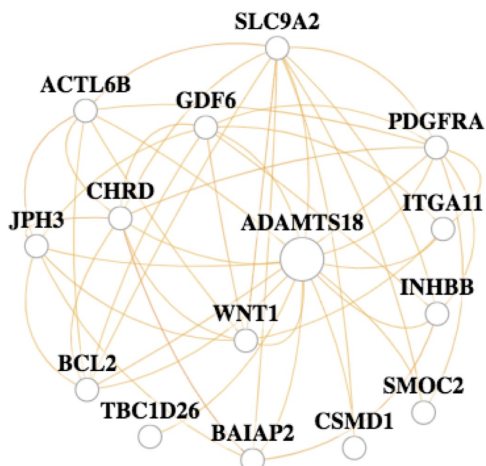

Supplementary Fig. S4. Predicted tissue- and biological process-specific gene-interaction networks for GALNT13, STXBP2, BOP1, HSF1, GRM7, MPRIP, ZFYVE28 and ADAMT18 in GIANT. The edges in a network indicate the predicted posterior probabilities of gene interactions between two genes. Top 14 genes highly connected to the query gene (large circle) are included in these networks.

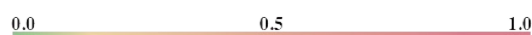

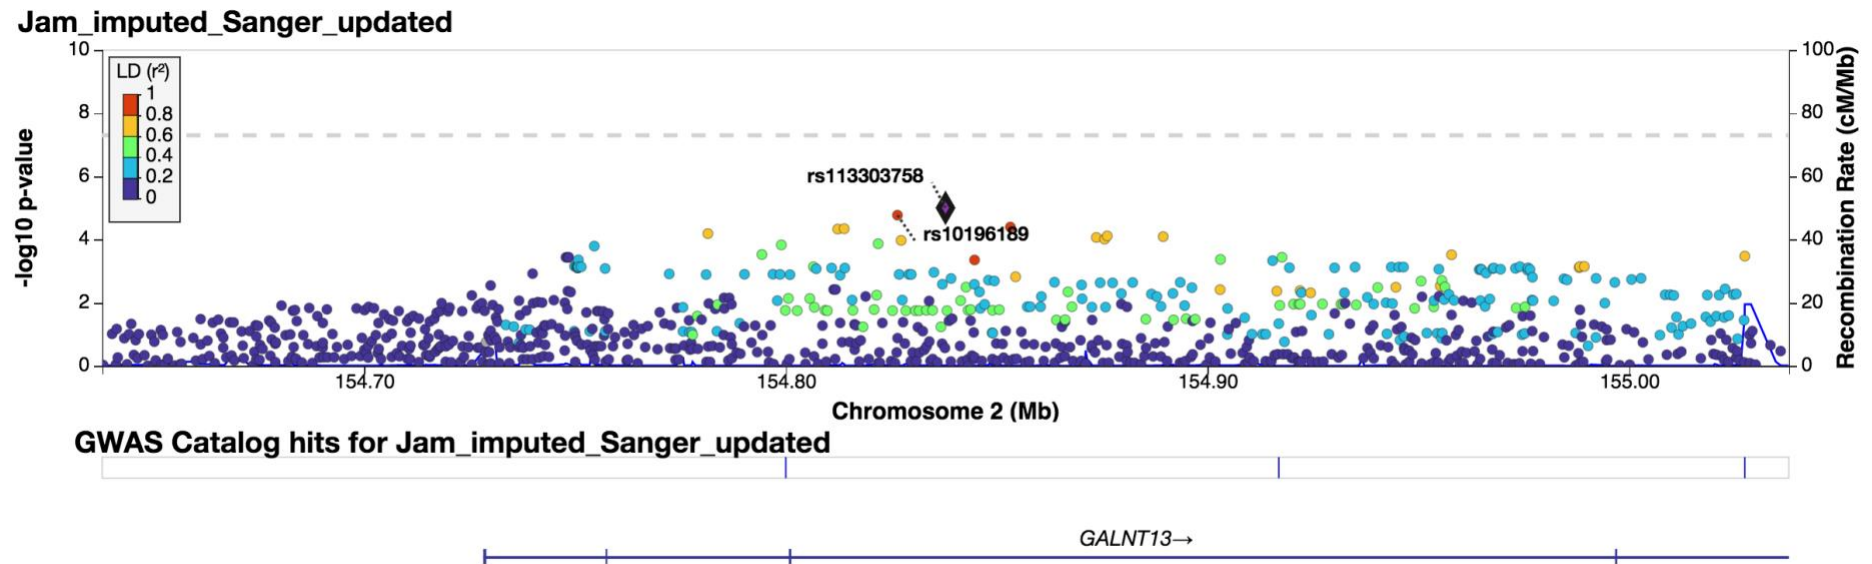

Supplementary Fig. S5. Regional association plot of 1Mb region surrounding the index SNP rs113303758 in *GALNT13* following Sanger Server imputation in the Jam cohort. -log<sub>10</sub> transformed *P* value indicates the strength of the association with elite sprint performance. The level of LD and the recombination rate are estimated using the 1000 Genomes AFR population in LocusZoom v0.14.0.



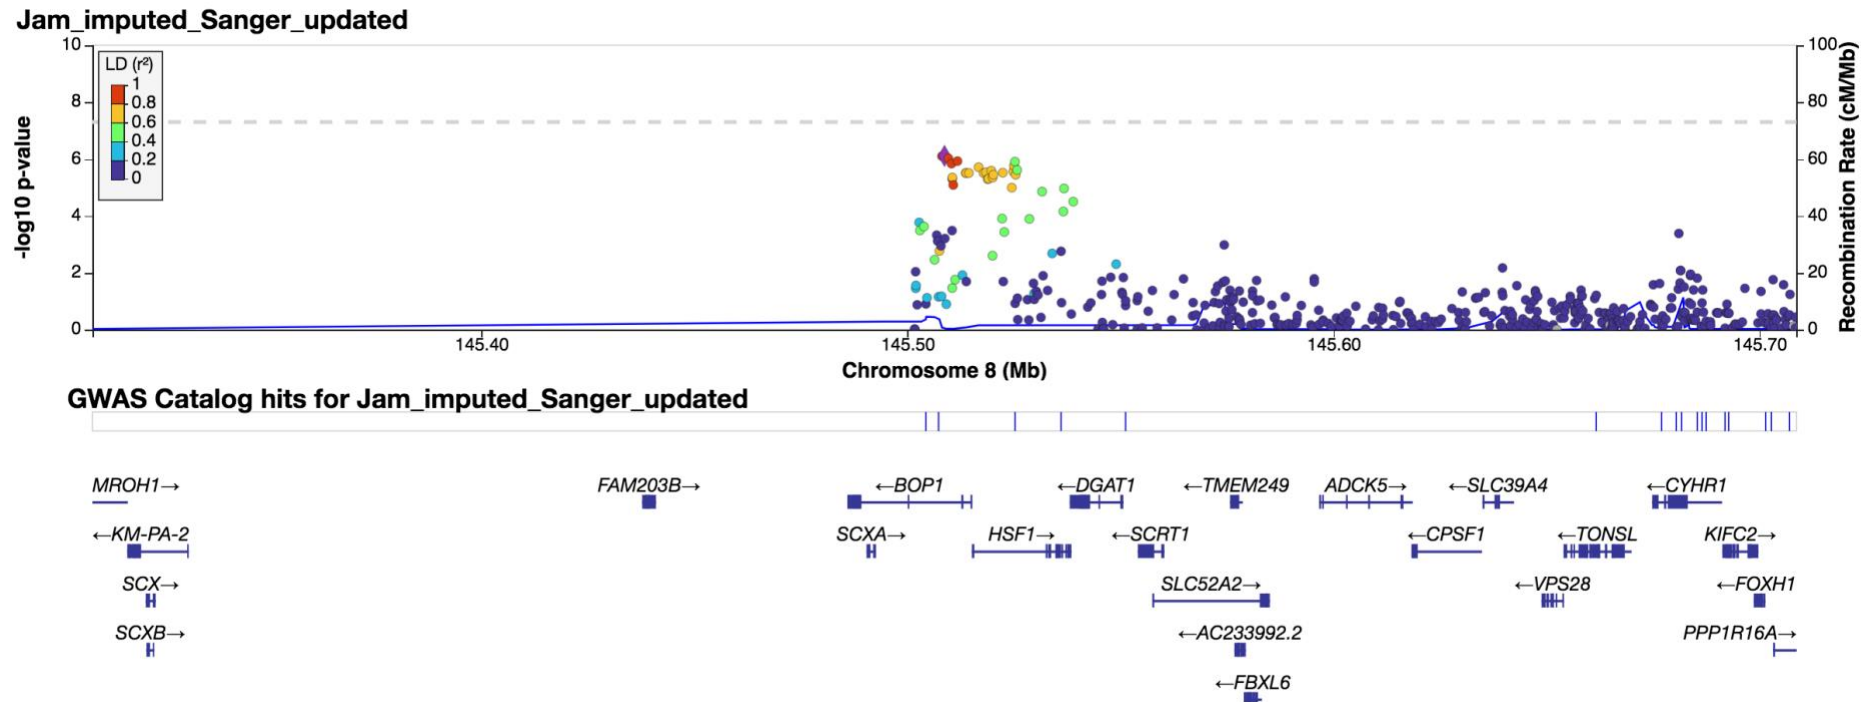

Supplementary Fig. S6. Regional association plot of 1Mb region surrounding the index SNP rs4977199 in *BOP1* following Sanger Server imputation in the Jam cohort.  $-\log_{10}$  transformed  $P$  value indicates the strength of the association with elite sprint performance. The level of LD and the recombination rate are estimated using the 1000 Genomes AFR population in LocusZoom v0.14.0.



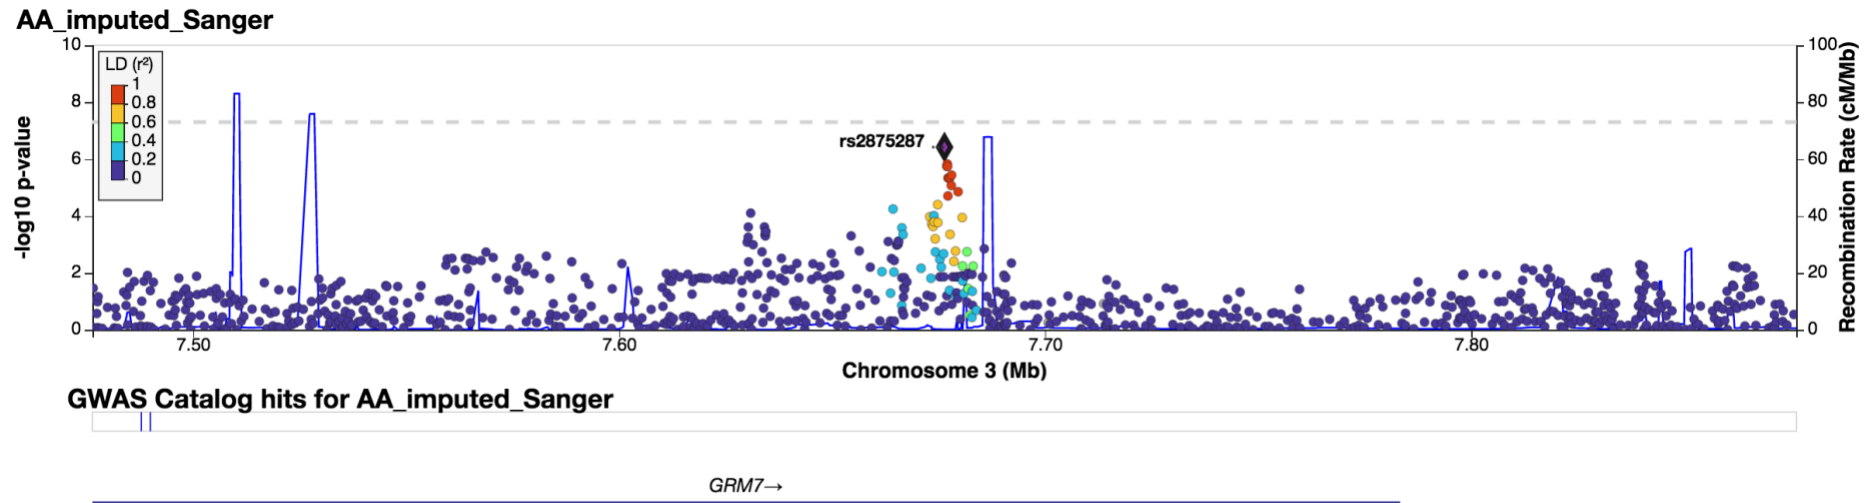

Supplementary Fig. S7. Regional association plot of 1Mb region surrounding the index SNP rs2875287 in *GRM7* following Sanger Server imputation in the A-A cohort.  $-\log_{10}$  transformed  $P$  value indicates the strength of the association with elite sprint performance. The level of LD and the recombination rate are estimated using the 1000 Genomes AFR population in LocusZoom v0.14.0.

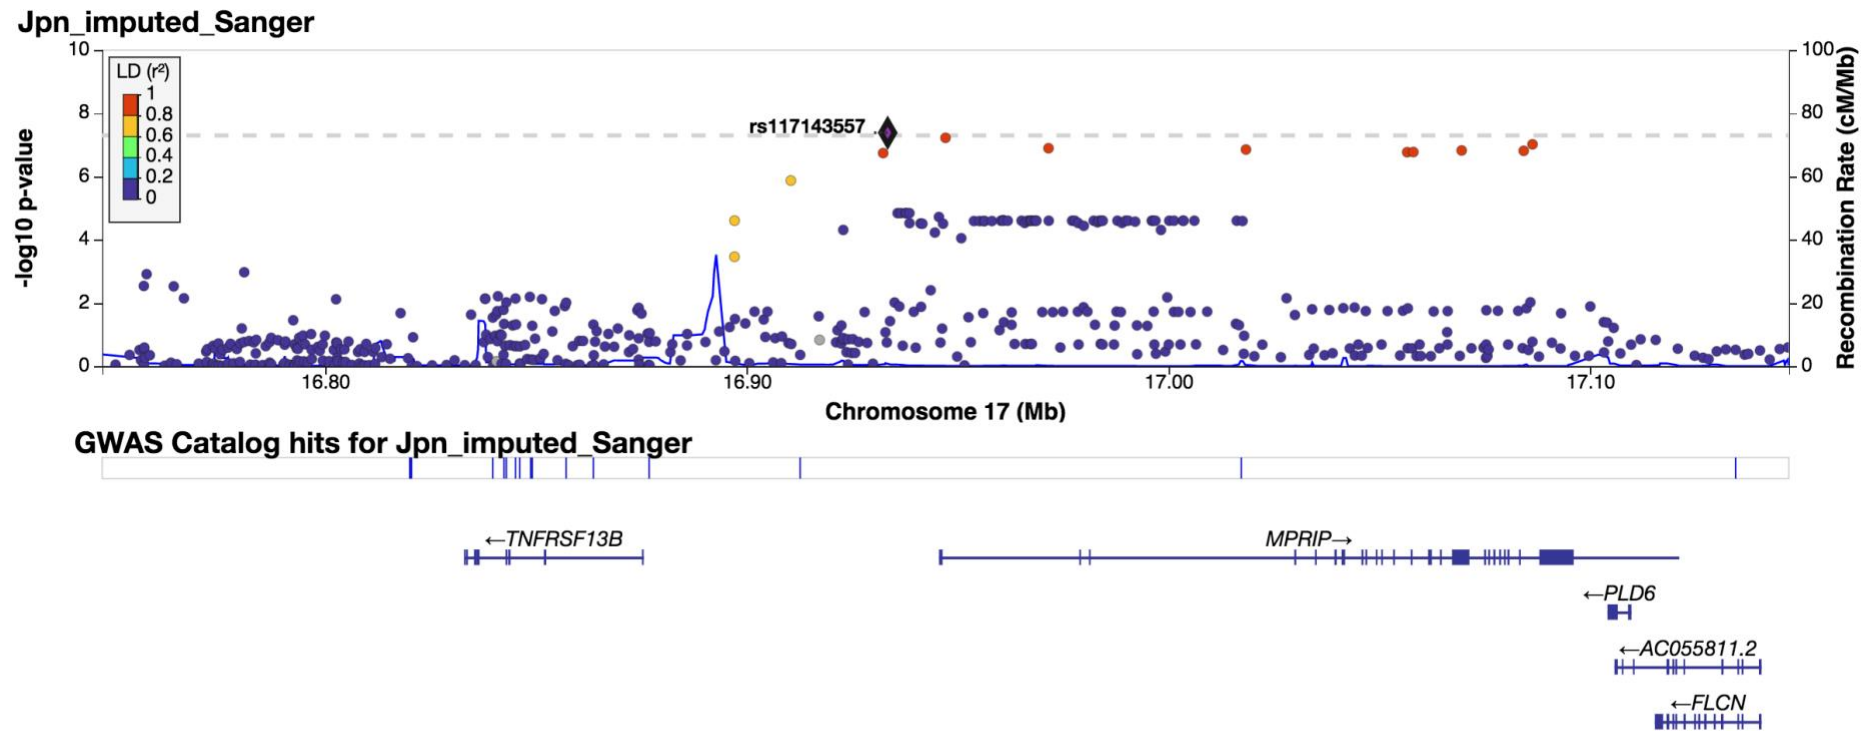

Supplementary Fig. S8. Regional association plot of 1Mb region surrounding the index SNP rs117143557 nearest *MPRIP* following Sanger Server imputation in the Jpn cohort.  $-\log_{10}$  transformed  $P$  value indicates the strength of the association with elite sprint performance. The level of LD and the recombination rate are estimated using the 1000 Genomes AFR population in LocusZoom v0.14.0.

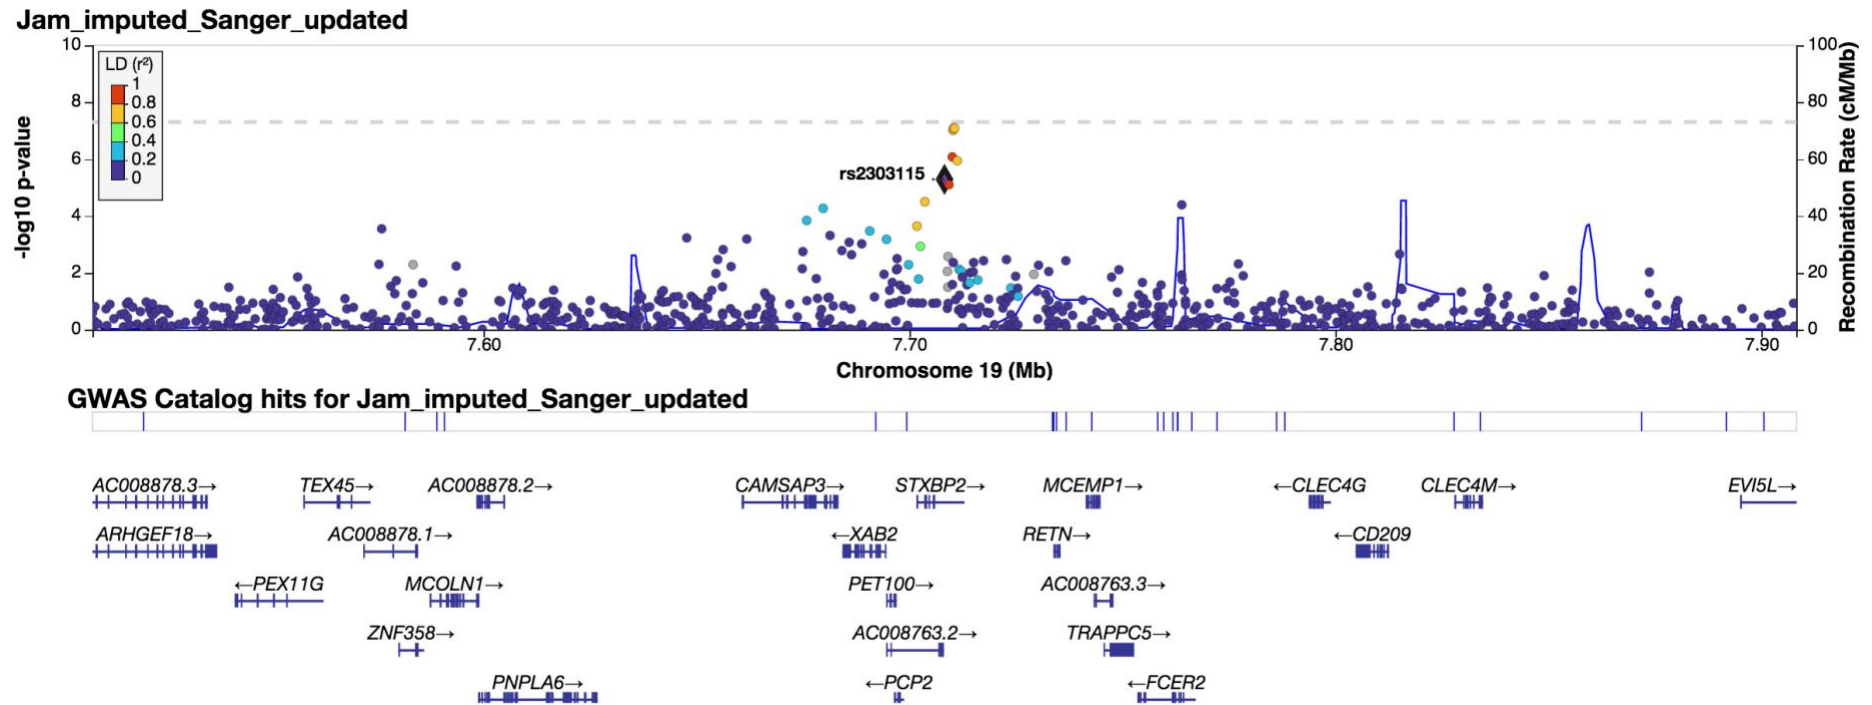

Supplementary Fig. S9. Regional association plot of 1Mb region surrounding the index SNP rs2303115 in *STXBP2* following Sanger Server imputation in the Jam cohort.  $-\log_{10}$  transformed  $P$  value indicates the strength of the association with elite sprint performance. The level of LD and the recombination rate are estimated using the 1000 Genomes AFR population in LocusZoom v0.14.0.

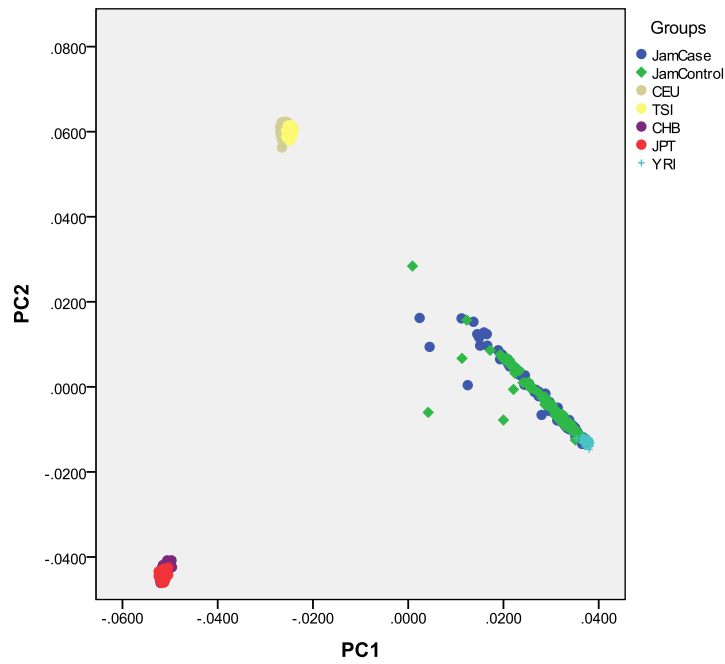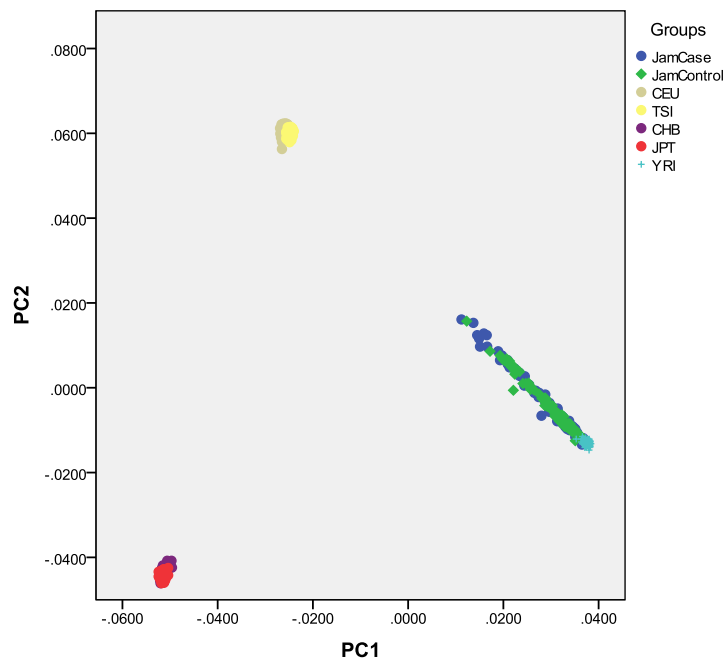

Supplementary Fig. S10. First two PCs for ancestry clustering of Jamaican sprint athletes and Jamaican controls alongside five Hapmap3 reference populations (CEU: Utah residents with Northern and Western European ancestry; TSI: Toscani in Italy; CHB: Han Chinese in Beijing, China; JPT: Japanese in Tokyo, Japan; YRI: Yoruba in Ibadan, Nigeria). Top: before the removal of outliers; bottom: after the removal of outliers.

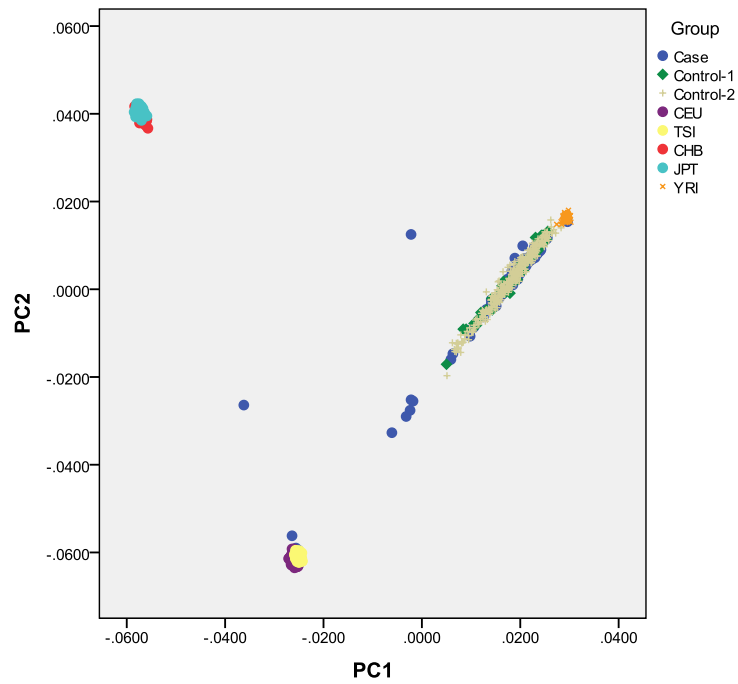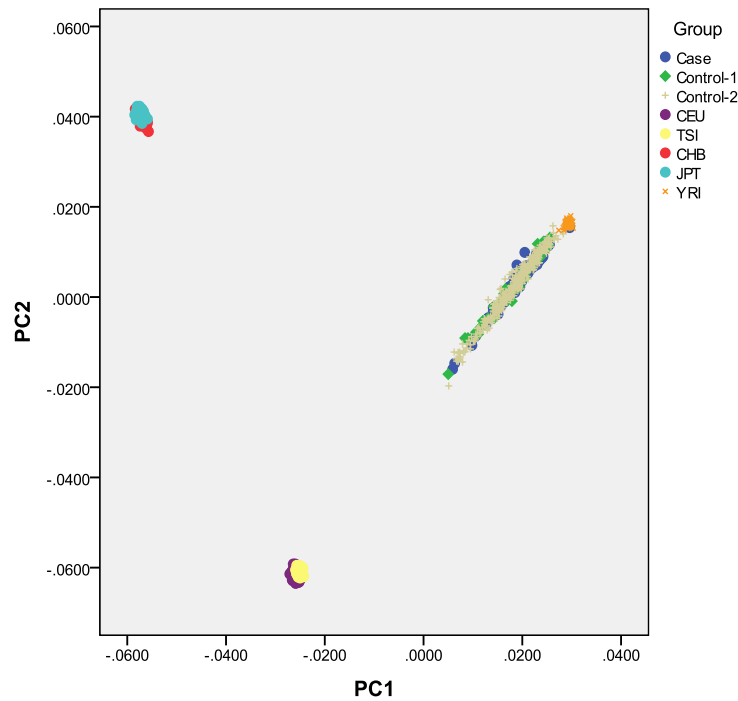

Supplementary Fig. S11. First two PCs for ancestry clustering of African-American sprint athletes and African-American controls alongside five Hapmap3 reference populations (CEU: Utah residents with Northern and Western European ancestry; TSI: Toscani in Italy; CHB: Han Chinese in Beijing, China; JPT: Japanese in Tokyo, Japan; YRI: Yoruba in Ibadan, Nigeria). Top graph: before the removal of outliers; bottom graph: after the removal of outliers. Control-1: 47 African-American controls; Control-2: 350 additional African-American controls.

Supplementary Table S1. Sample size of the two European replication cohorts for rs10196189 stratified according to geographical locations.

|                 | Population   | Sprinters and jumpers | Other power/sprint oriented athletes | Endurance  | Controls    |
|-----------------|--------------|-----------------------|--------------------------------------|------------|-------------|
| <b>Cohort 1</b> | Belarusian   | 35                    | 53                                   | 16         | 205         |
|                 | Lithuanian   | 41                    | 37                                   | 181        | 392         |
|                 | Russian      | 57                    | 144                                  | 254        | 928         |
|                 | <b>Total</b> | <b>133</b>            | <b>234</b>                           | <b>451</b> | <b>1525</b> |
| <b>Cohort 2</b> | Australian   | 55                    | 79                                   | 121        | 261         |
|                 | Belgium      | 26                    | 28                                   | -          | 129         |
|                 | Greek        | 54                    | 13                                   | 23         | 55          |
|                 | Polish       | 36                    | 48                                   | 108        | 150         |
|                 | <b>Total</b> | <b>171</b>            | <b>168</b>                           | <b>252</b> | <b>595</b>  |

Note: No differences in allele frequencies or genotype distributions among the populations within each cohort in controls ( $\chi^2=9.32$ ,  $P=0.16$  in cohort 1;  $\chi^2=4.54$ ,  $P=0.6$  in cohort 2).

Supplementary Table S2. Genotype counts of rs10196189 stratified according to athlete types in each of the European replication cohorts.

| <b>Cohort 1</b>                      | <b>AA</b> | <b>AG</b> | <b>GG</b> | <b>Total</b> |
|--------------------------------------|-----------|-----------|-----------|--------------|
| Sprinters (100-400m) and jumpers     | 97        | 35        | 1         | 133          |
| Other power/sprint oriented athletes | 161       | 68        | 5         | 234          |
| Endurance athletes                   | 345       | 98        | 8         | 451          |
| Controls                             | 1190      | 315       | 20        | 1525         |
| <b>Cohort 2</b>                      | <b>AA</b> | <b>AG</b> | <b>GG</b> | <b>Total</b> |
| Sprinters (100-400m) and jumpers     | 115       | 48        | 8         | 171          |
| Other power/sprint oriented athletes | 123       | 43        | 2         | 168          |
| Endurance athletes                   | 200       | 46        | 6         | 252          |
| Controls                             | 439       | 148       | 8         | 595          |



Supplementary Table S3. Individuals failed sample QCs and excluded from further association analyses in the current GWAS cohorts.

|                                   | <b>Jam</b>               | <b>A-A</b>               | <b>Jpn</b> |
|-----------------------------------|--------------------------|--------------------------|------------|
| <b>Sex-check</b>                  | 2 athletes<br>2 controls | 6 athletes<br>2 controls | -          |
| <b>Call rate</b>                  | 1 athlete<br>1 control   | -                        | -          |
| <b>Outliers of heterozygosity</b> | 4 controls               | 6 athletes<br>2 controls | 2 controls |
| <b>Cryptic relatedness</b>        | 1 athlete<br>4 controls  | 2 athletes<br>1 control  | -          |
| <b>Outliers of PCA</b>            | 3 athletes<br>4 controls | 13 athletes              | -          |
